# Supplementary material
Source: publisher figshare collection journal article supplement (https://tandf.figshare.com/ndownloader/files/17602025)
Supplement: Supplementary file 1 [file 17602025]

**SUPPLEMENTARY MATERIAL**

**The results of additional statistical analysis with the distress as a continuous covariate**

The LMEM for systolic blood pressure showed a significant effect for *Time* factor only, *F*(4,88) = 6.71, *p*< .001, *R*2= .23. The main effect of *Distress*, *F*(1,22) = 2.92, *p*= .100, *R*2 = .12, and the *Time* by *Distress* interaction, *F*(4,88) = 0.33, *p*= .860, *R*2 = .01, were not statistically significant.

The LMEM for diastolic blood pressure showed a significant effect for *Time* factor only, *F*(4,88) = 6.95, *p*< .001, *R*2= .24. The main effect of *Distress*, *F*(1,22) = 1.90, *p*= .182, *R*2 = .08, and the *Time* by *Distress* interaction, *F*(4,88) = 1.87, *p*= .123, *R*2 = .08, were not statistically significant.

The LMEM for heart rate showed a marginally significant effect for *Time* factor, *F*(4,87) = 2.25, *p*= .070, *R*2= .09. The main effect of *Distress*, *F*(1,22) = 0.04, *p* = .854, *R*2 < .01, and the *Time* by *Distress* interaction, *F*(4,87) = 0.52, *p*= .725, *R*2 = .02, were not statistically significant.

The LMEM for cortisol concentrations showed significant effects for *Time*, *F*(4,88) = 5.99, *p*< .001, *R*2= .21, *Distress*, *F*(1,22) = 15.93, *p* < .001, *R*2 = .42, and also their interaction, *F*(4,88) = 3.42, *p*= .012, *R*2 = .13.

The LMEM for aldosterone concentrations showed significant effects of *Time*, *F*(4,85) = 3.12, *p*= .019, *R*2= .13, and *Time* by *Distress* interaction, *F*(4,85) = 3.27, *p*= .015, *R*2 = .13. The main effect of *Distress* was not statistically significant, *F*(1,22) = 1.30, *p* = .267, *R*2 = .06.

The LMEM for alpha-amylase activity showed no significant effects for *Time*, *F*(4,88) = 1.36, *p*= .254, *R*2= .06, *Distress,* *F*(1,22) = 0.57, *p* = .460, *R*2 = .03, or their interaction, *F*(4,88) = 1.33, *p*= .266, *R*2 = .06.

The LMEM for interleukin-1beta concentrations indicated a statistically non-significant effect *Time*, *F*(4,88) = 1.10, *p*= .361, *R*2= .05. However, the effect of *Distress*, *F*(1,22) = 12.41, *p*= .001, *R*2= .36, and the *Time* by *Distress* interaction, *F*(4,88) = 4.70, *p*= .002, *R*2= .18, were statistically significant.

Finally, the LMEM for rate pressure product showed a marginally significant effect of *Time*, *F*(1,22) = 3.60, *p* = .070, *R2* = .14. The effect of *Distress* and *Time* by *Distress* interaction were not statistically significant, *F*(1,22) = 0.78, *p* = .387, *R2* = .03 and *F*(1,22) = 0.38, *p* = .545, *R2* = .02, respectively.
